# Supplementary material for: Naphth[1,2-d]imidazoles Bioactive from β-Lapachone: Fluorescent Probes and Cytotoxic Agents to Cancer Cells
Source: MDPI journal article supplement (doi:10.3390/molecules28073008), 2023-03-28
Supplement: s1 [file s1]

## SUPPLEMENTARY INFORMATION

# Naphth[1,2-*d*]imidazoles bioactive from $\beta$ -Lapachone: fluorescent probes and cytotoxic agents to cancer cells

Victória Laysna dos Anjos Santos <sup>1</sup>, Arlan de Assis Gonsalves <sup>1,2</sup>, Délis Galvão Guimarães <sup>3</sup>, Sidney Silva Simplicio <sup>1</sup>, Helinando Pequeno de Oliveira <sup>2</sup>, Lara Polyana Silva Ramos <sup>4</sup>, Marcília Pinheiro da Costa <sup>4</sup>, Fátima de Cássia Evangelista de Oliveira <sup>5</sup>, Claudia Pessoa <sup>5</sup>, Cleônia Roberta Melo Araújo <sup>1,\*</sup>

### 1. Molecular structure elucidation of synthesized naphth[1,2-*d*]imidazoles (IM1–IM7).

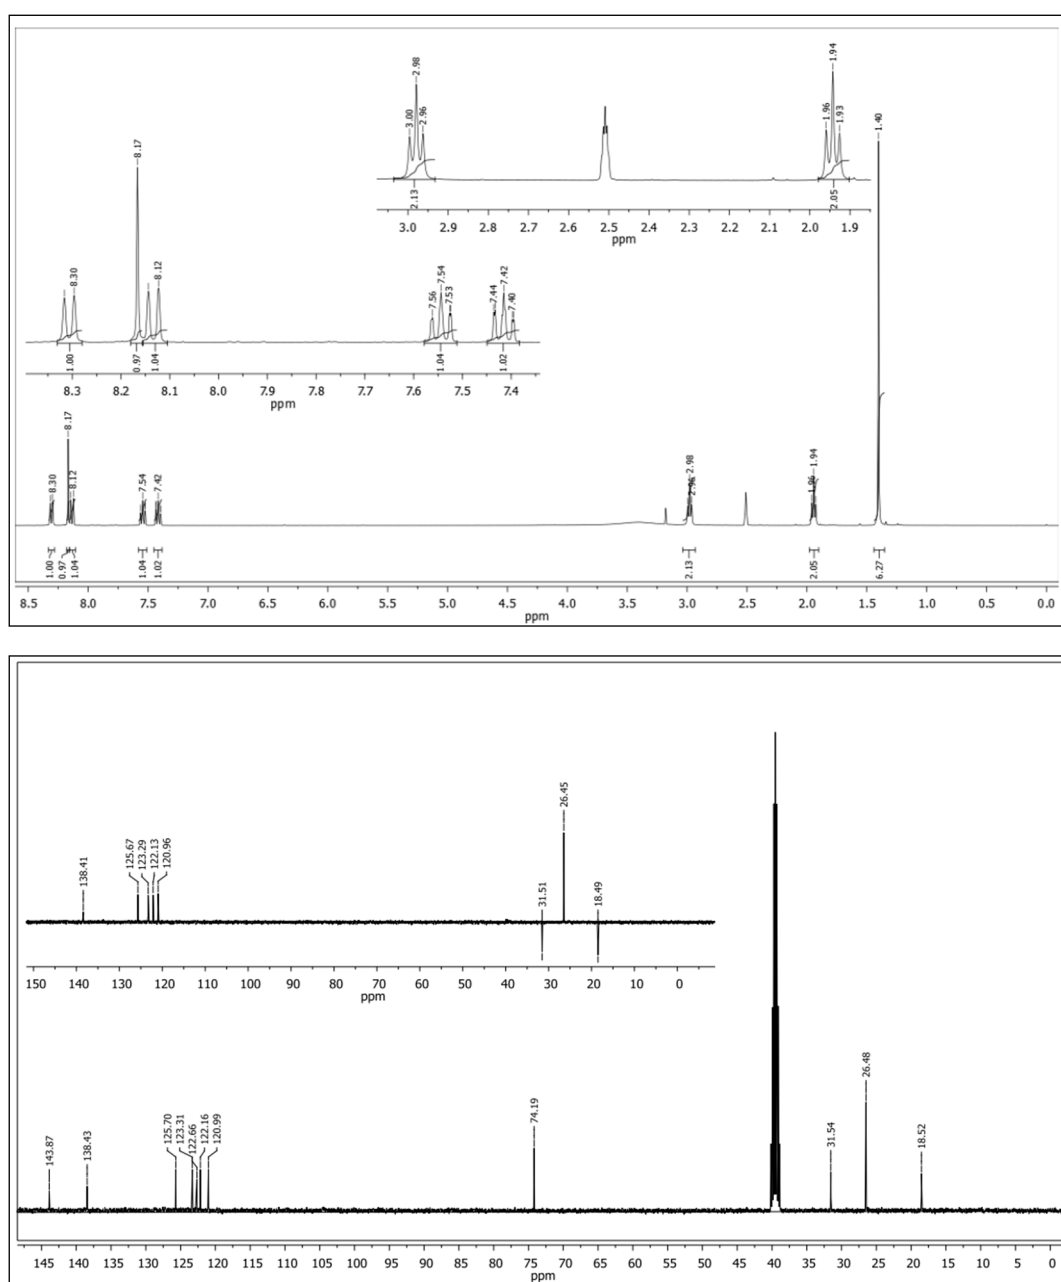

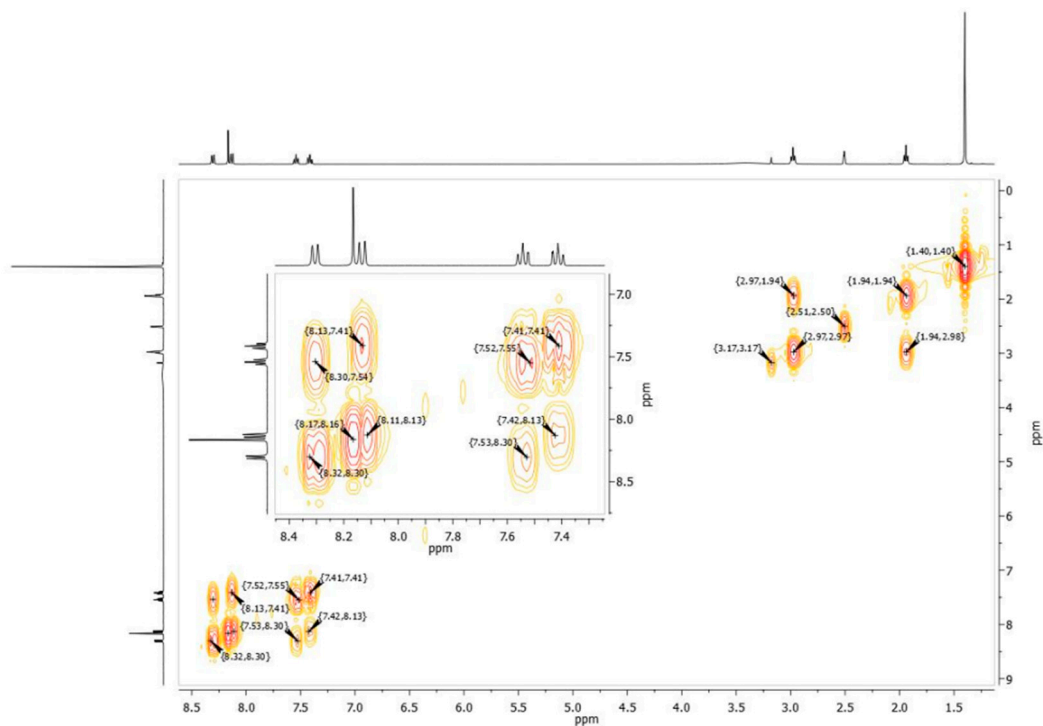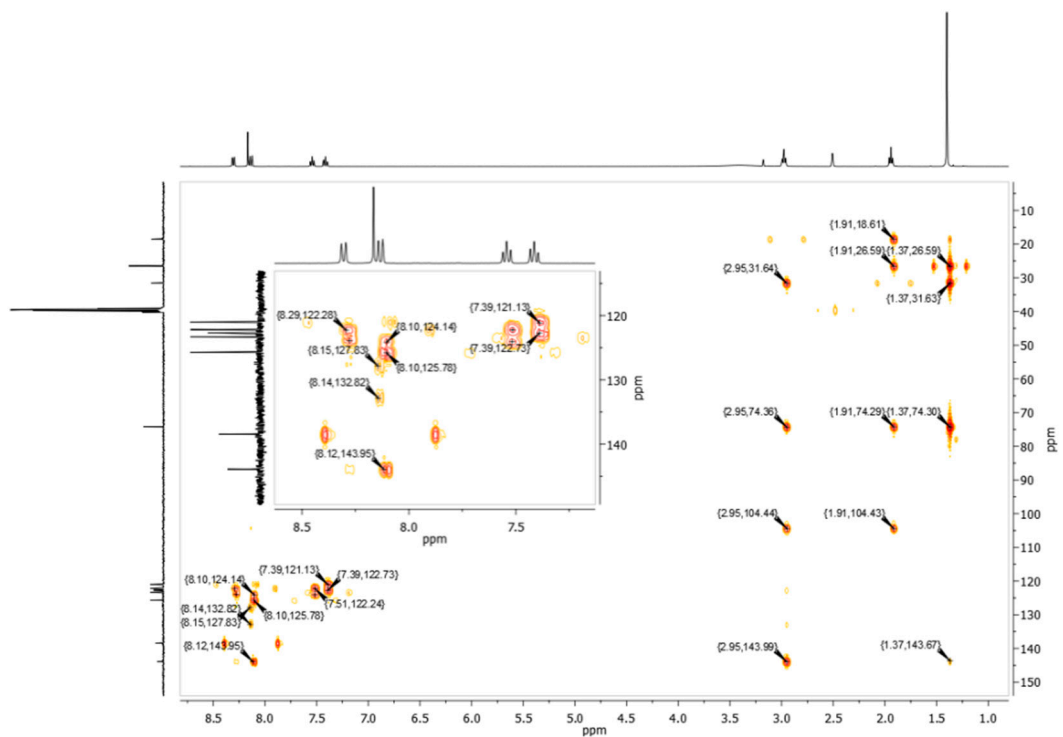

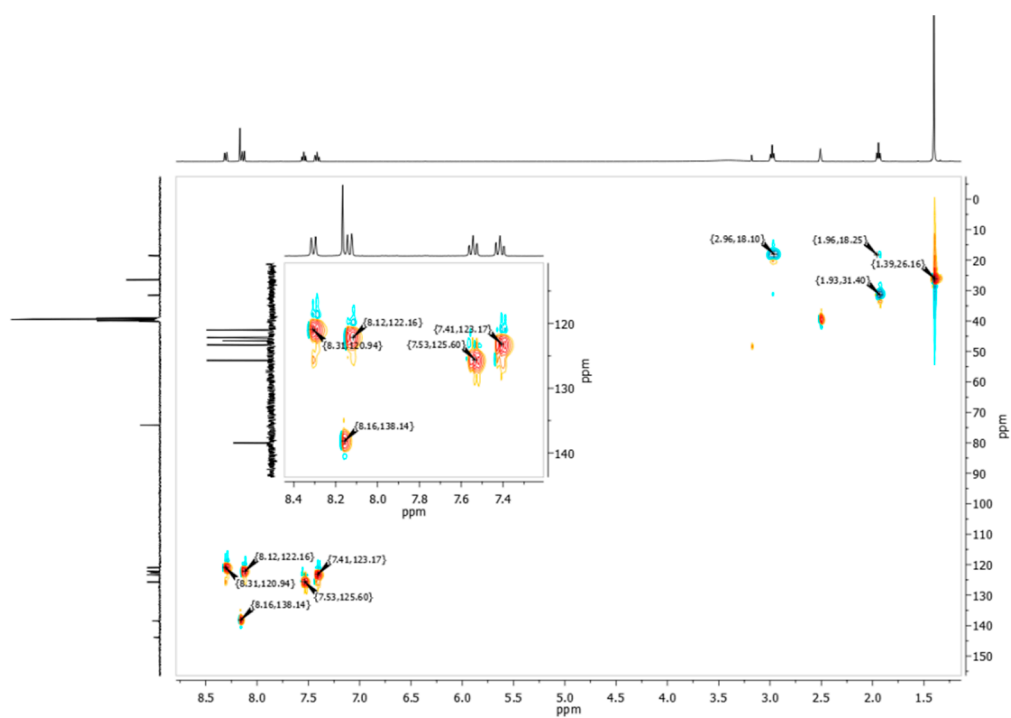

**Figure S1.** NMR spectra of 4,5-dihydro-6,6-dimethyl-6*H*-2-pyran[*b*-4,3]naphth[1,2-*d*]imidazole (IM1) in DMSO-*d*<sub>6</sub>.

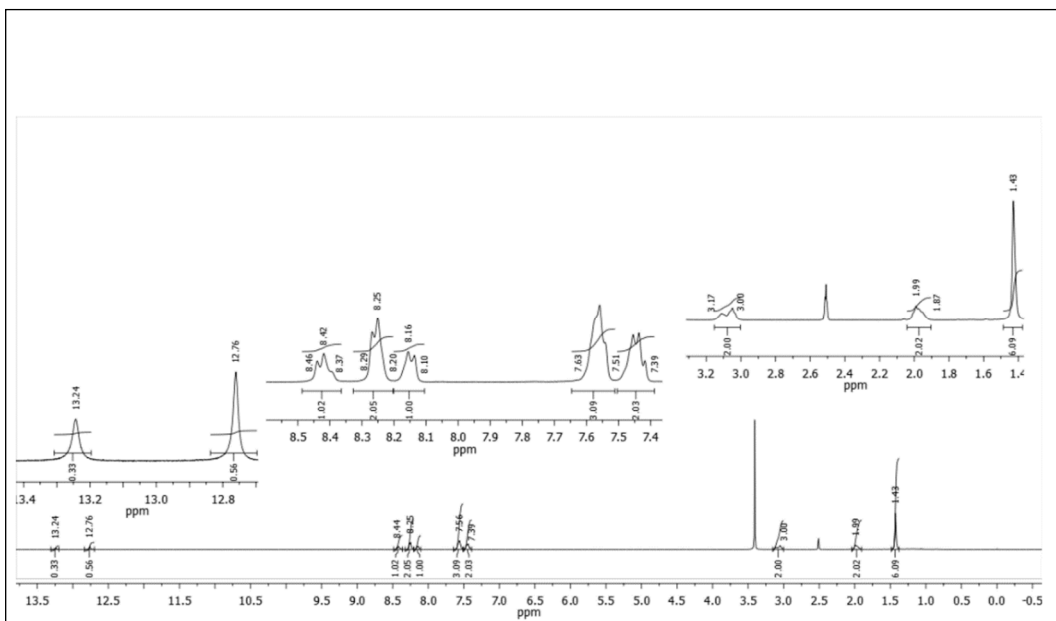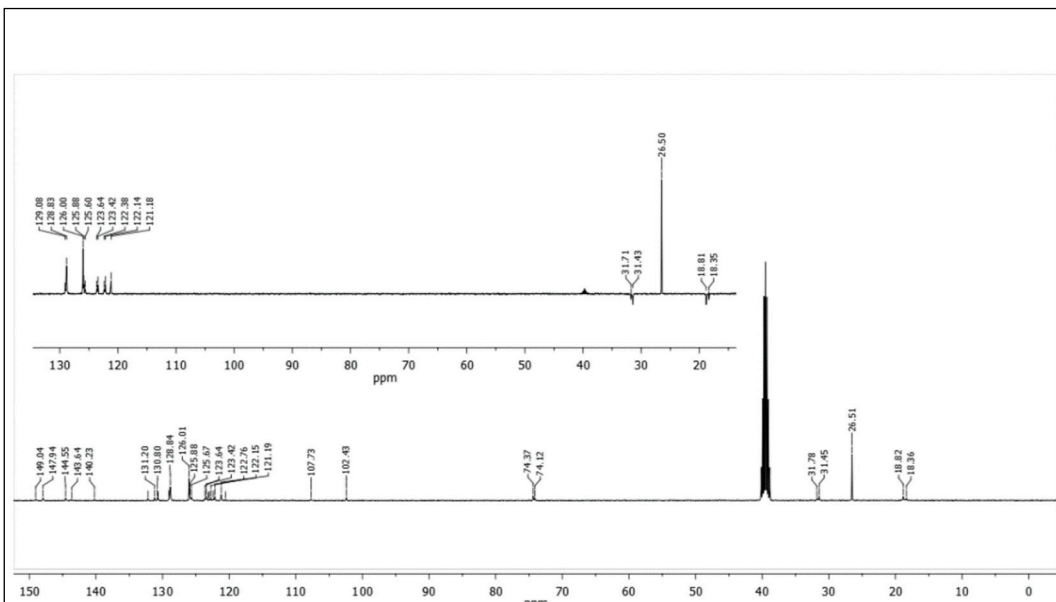

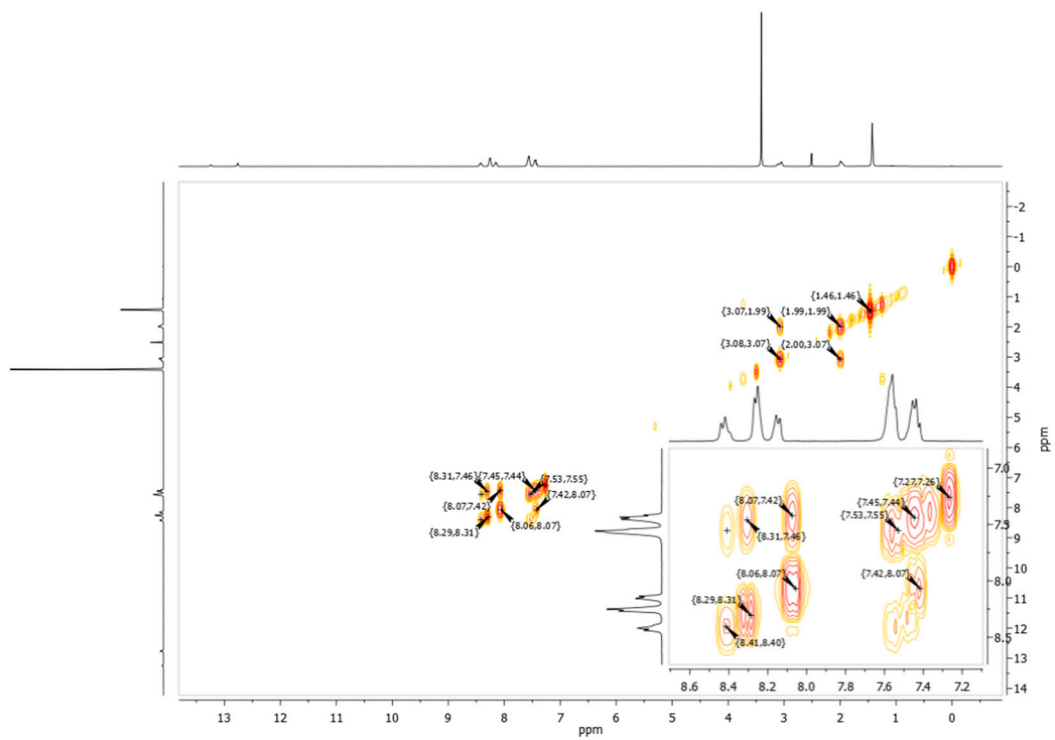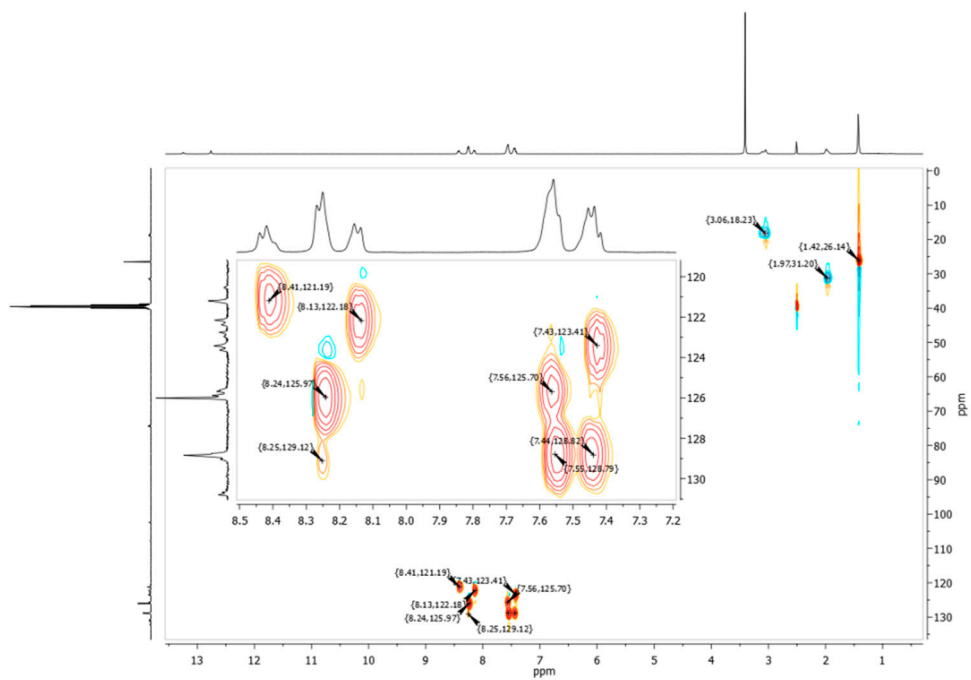

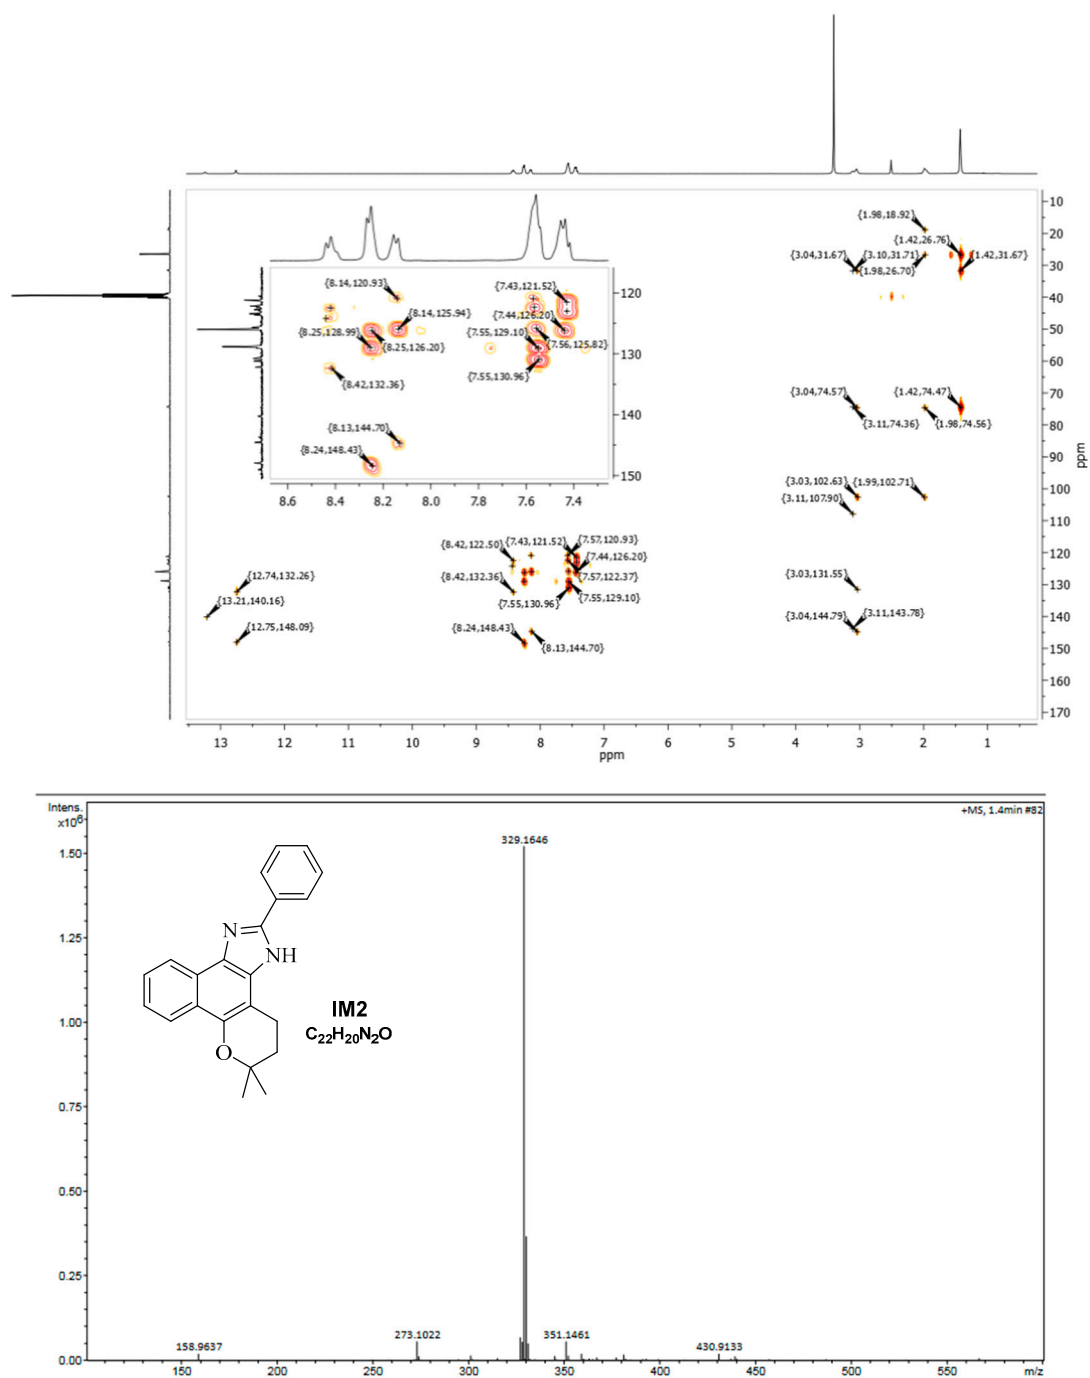

**Figure S2.** NMR spectra of 4,5-dihydro-6,6-dimethyl-6H-2-(phenyl)-pyran[b,3]naphth[1,2-d]imidazole (IM2) in DMSO-*d*<sub>6</sub> and ESI-MS.

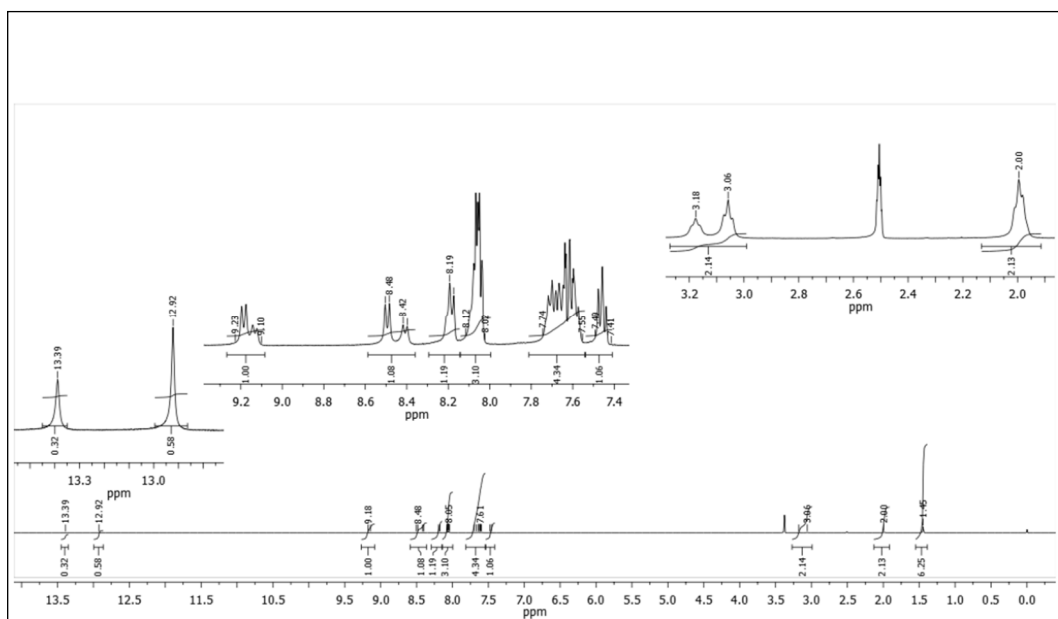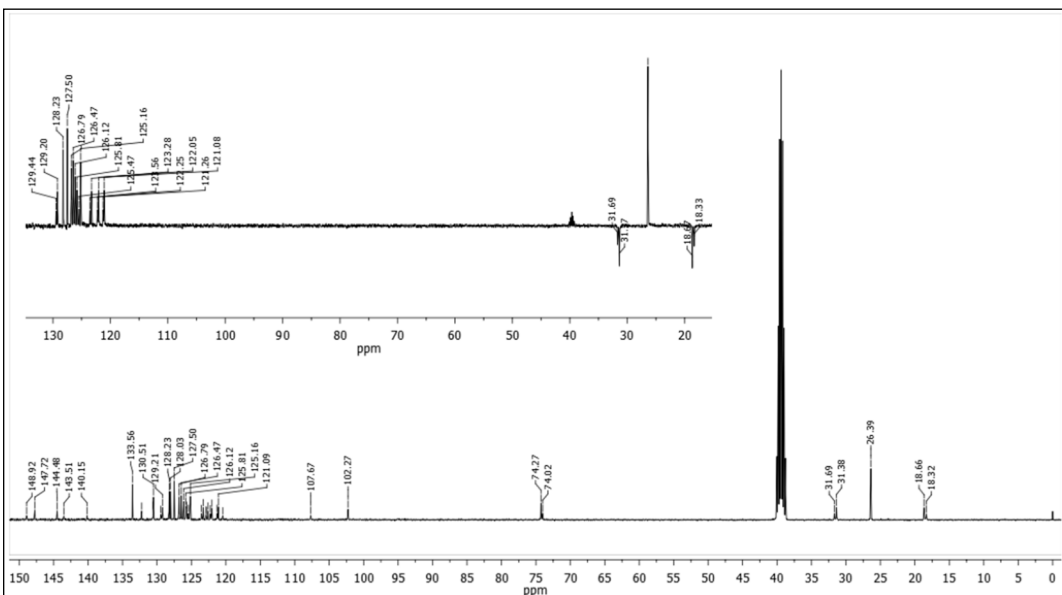

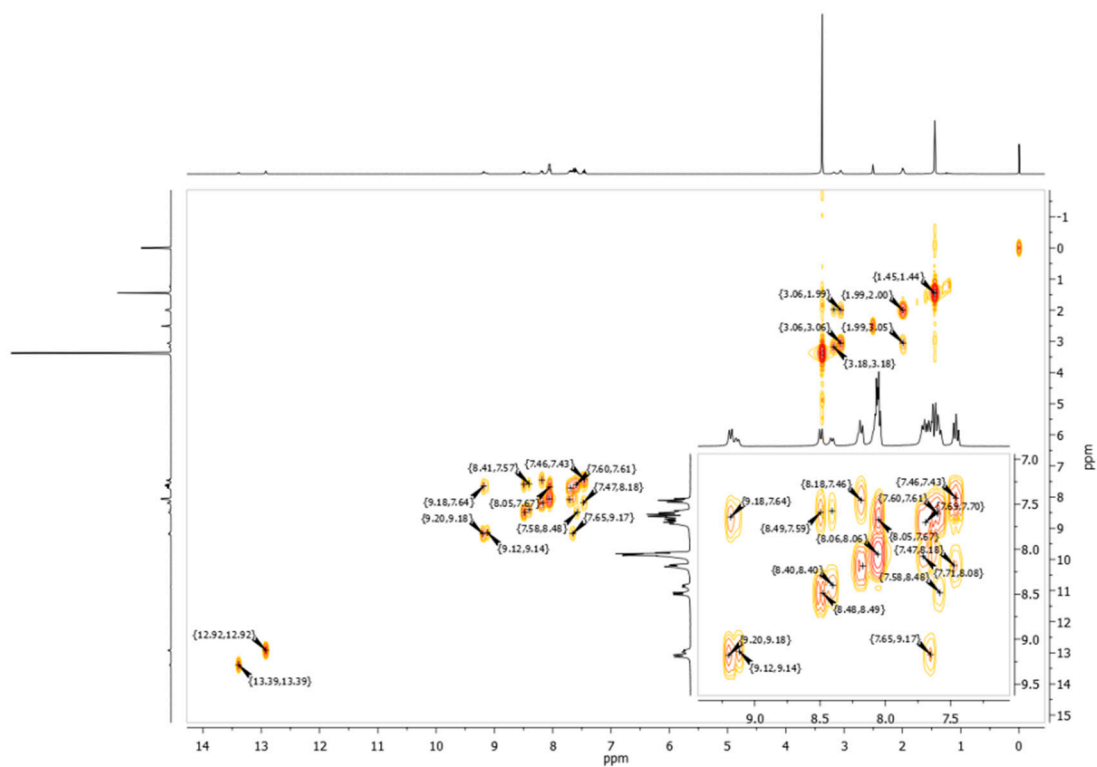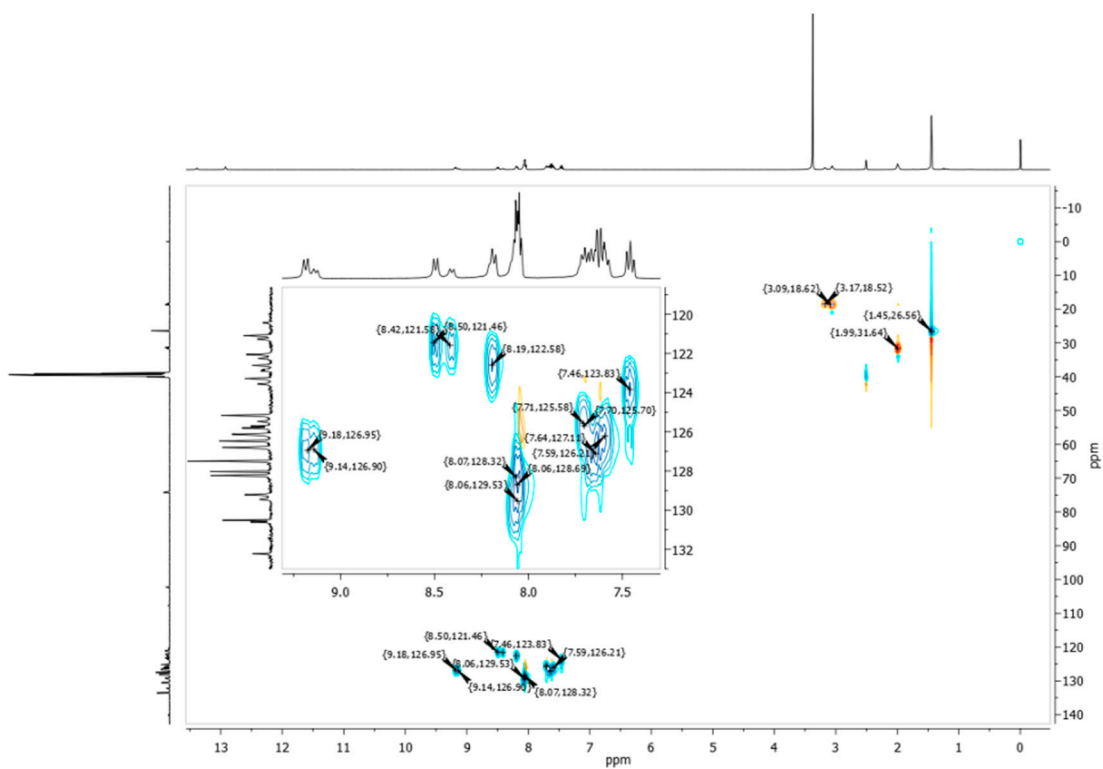









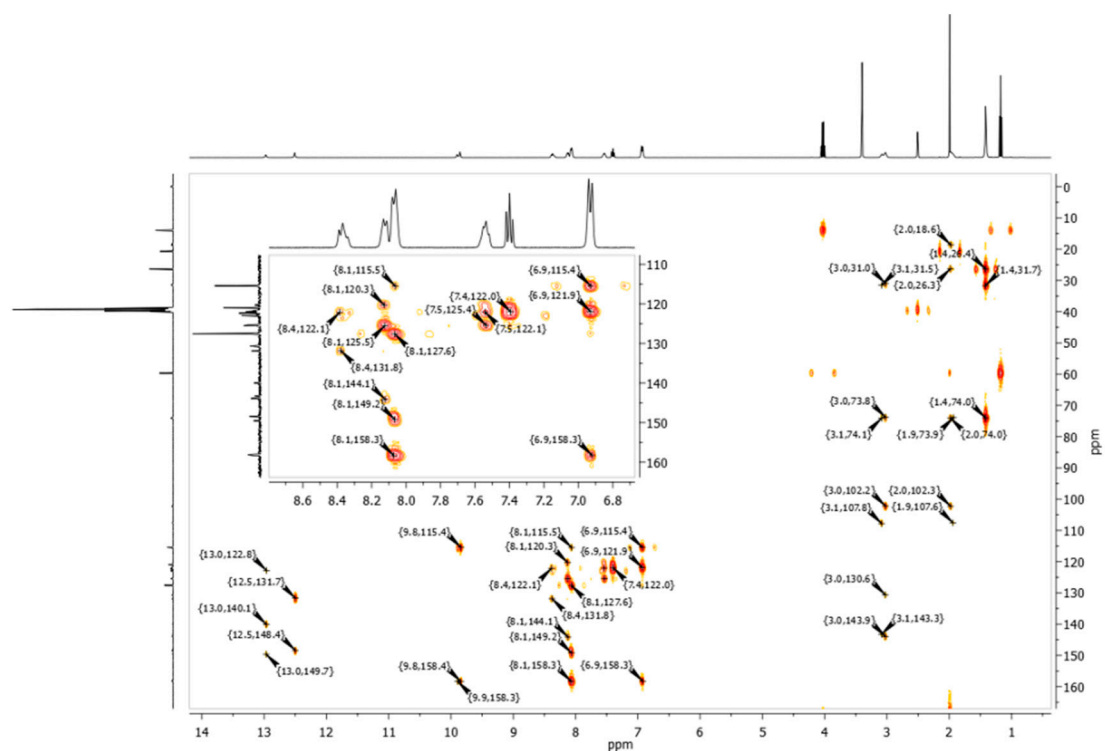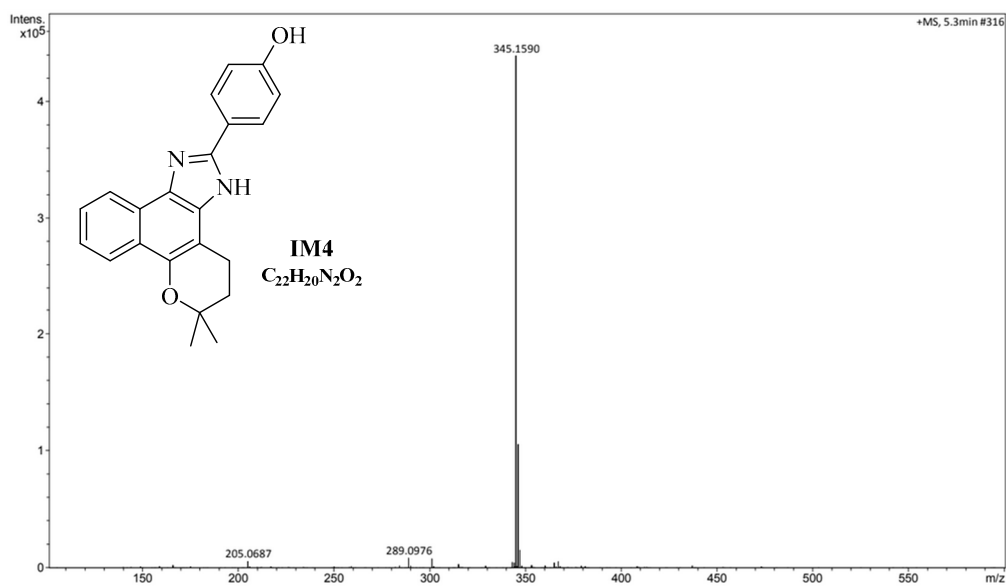

**Figure S4.** NMR spectra of 4,5-dihydro-6,6-dimethyl-6H-2-(4-hydroxyphenyl)-pyran[*b*-4,3]naphth[1,2-*d*]imidazole (**IM4**) in DMSO- $d_6$  and ESI-MS.

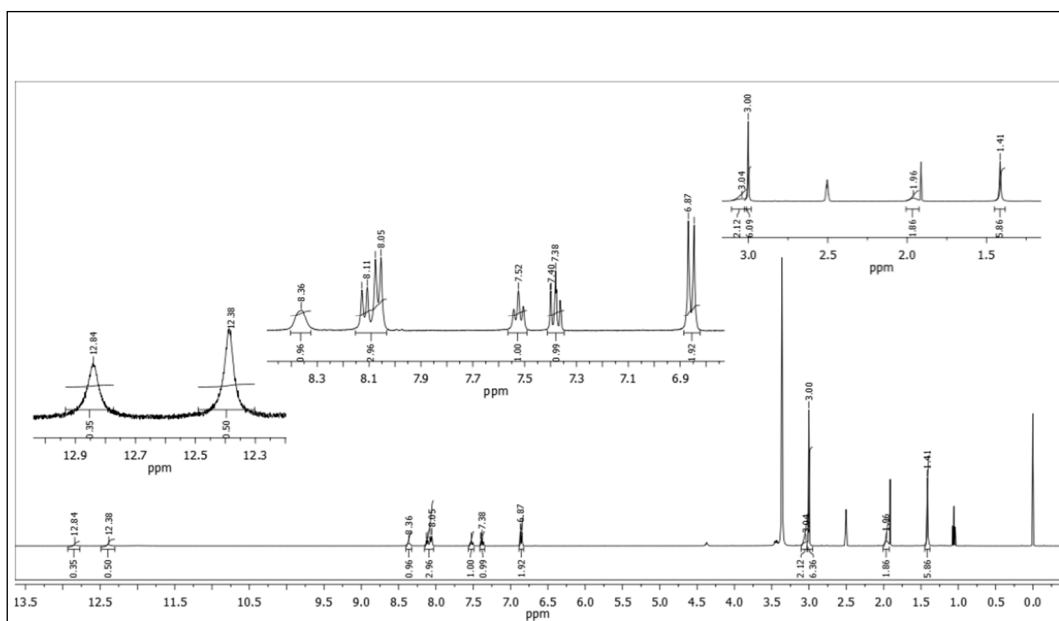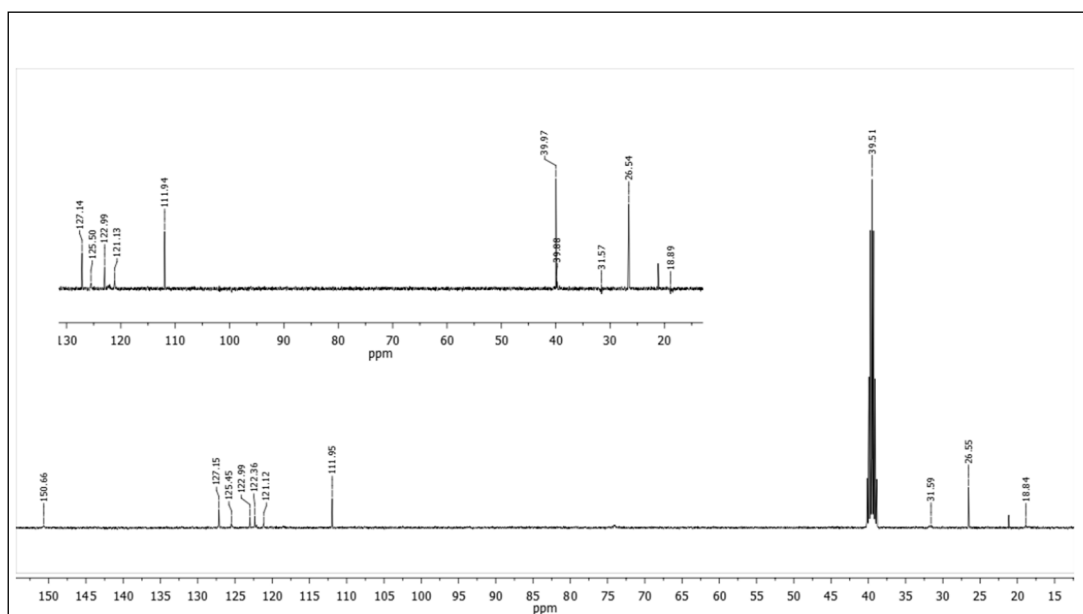

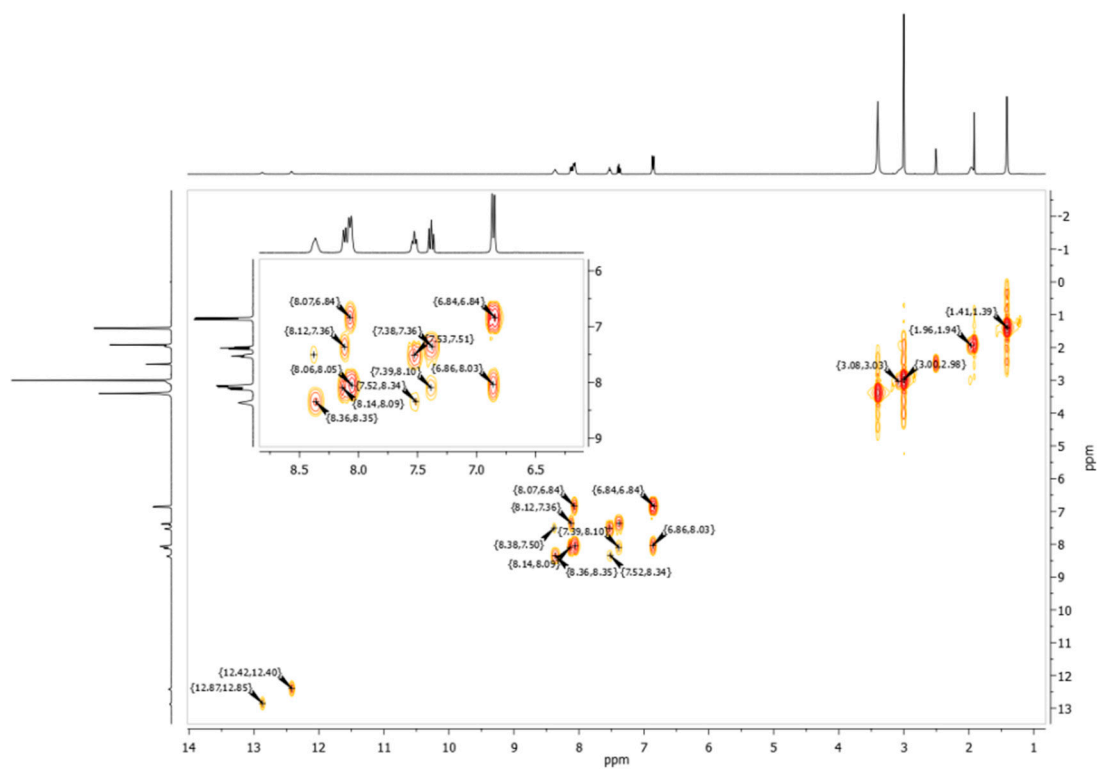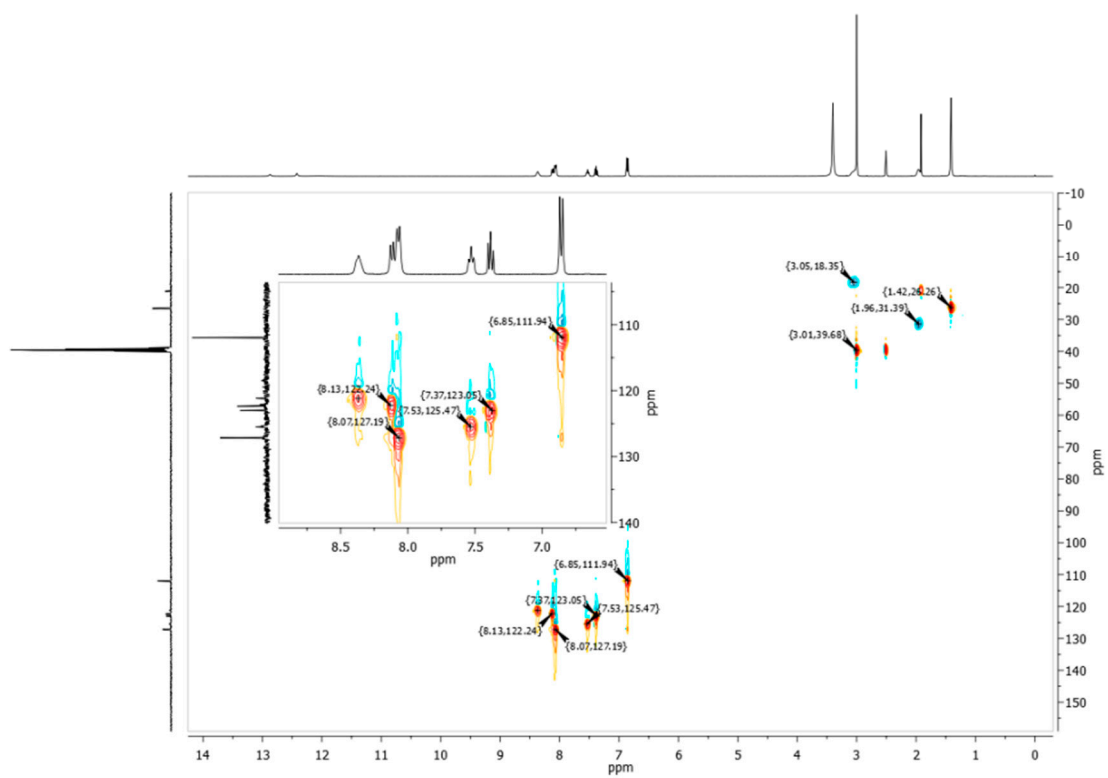

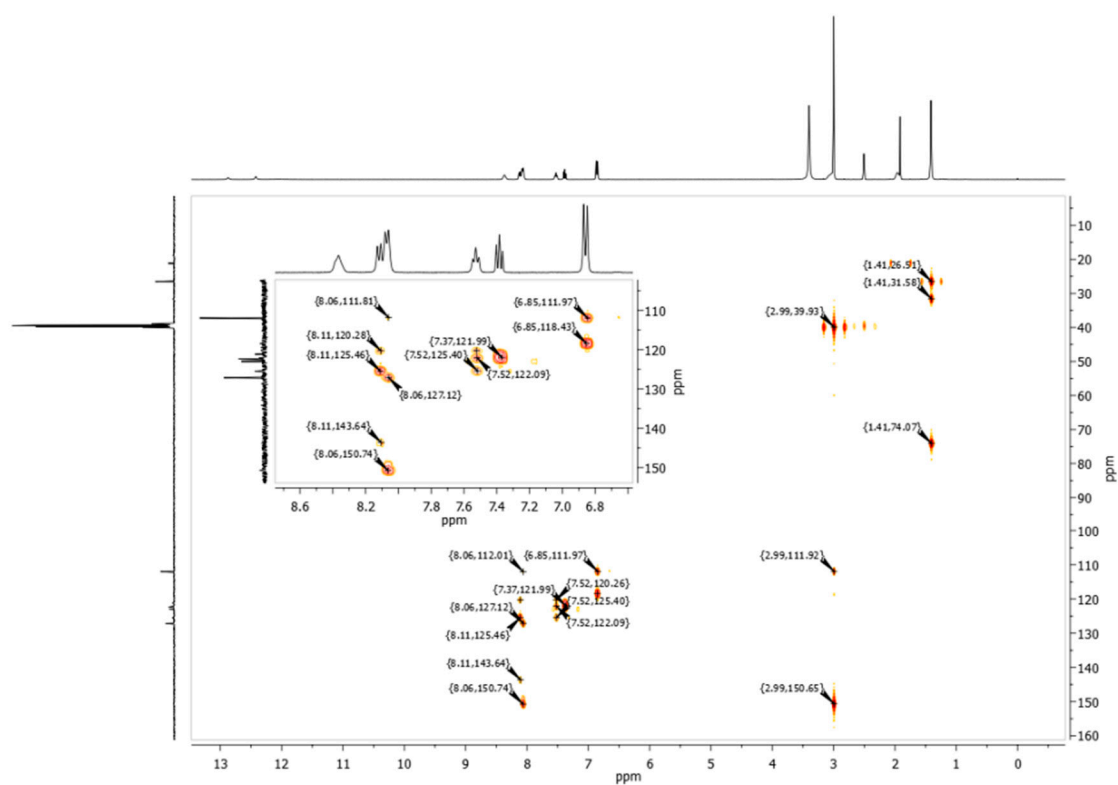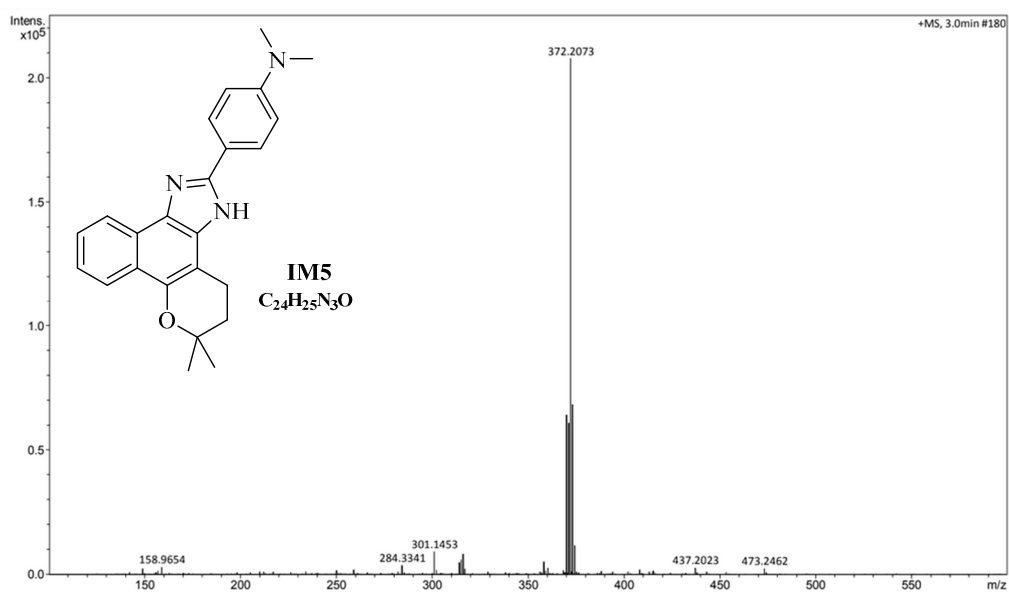

**Figure S5.** NMR spectra of 4,5-dihydro-6,6-dimethyl-6*H*-2-(4-dimethylaminophenyl)-pyran[*b*-4,3]naphth[1,2-*d*]imidazole (**IM5**) in DMSO-*d*<sub>6</sub> and ESI-MS.

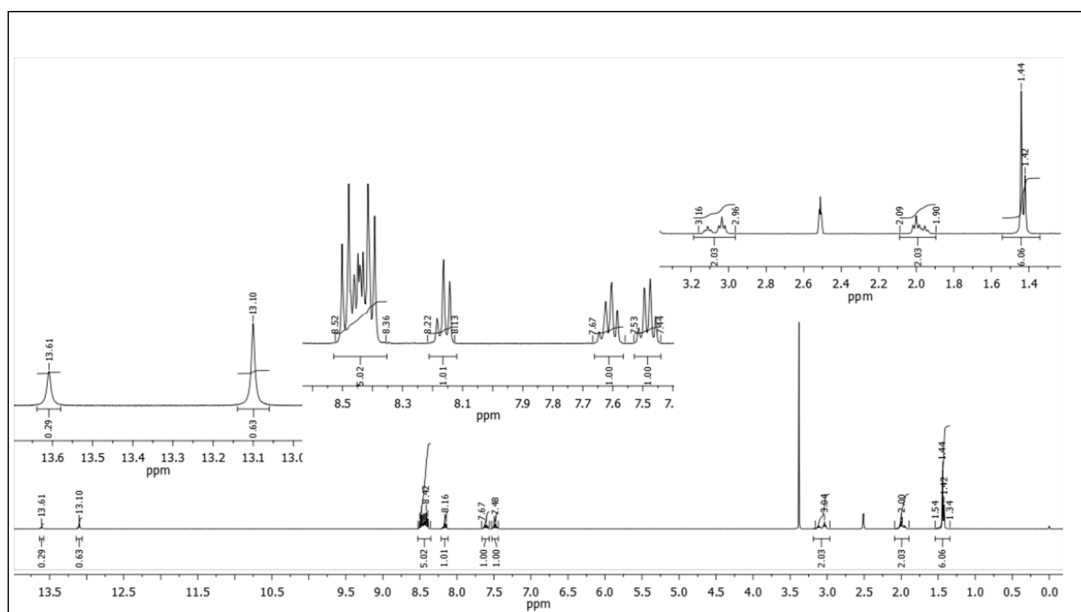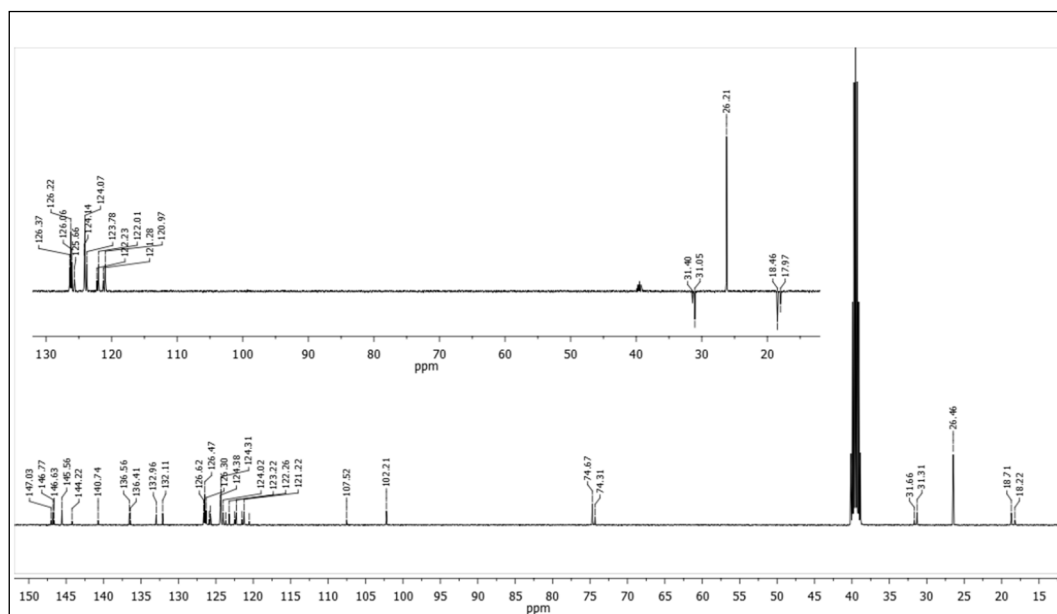



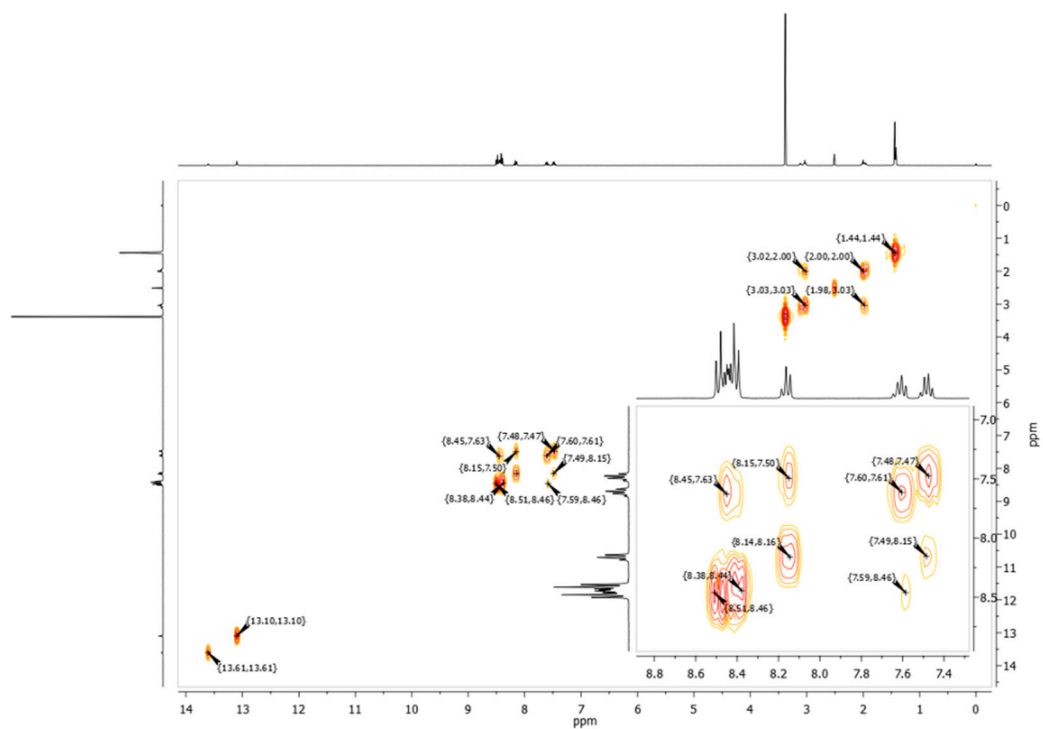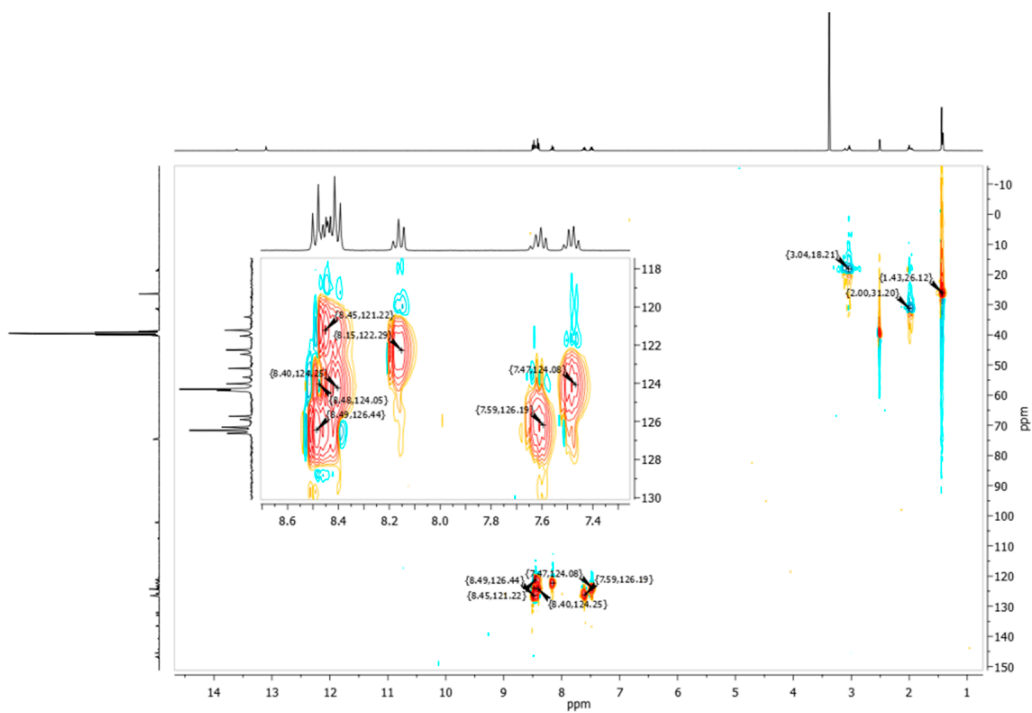

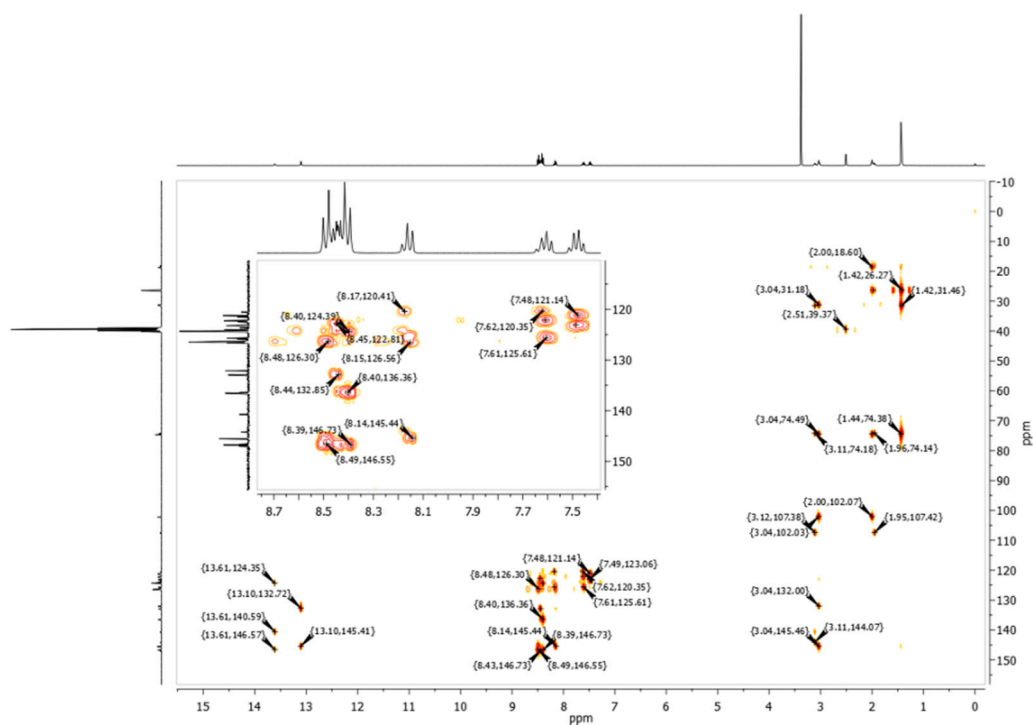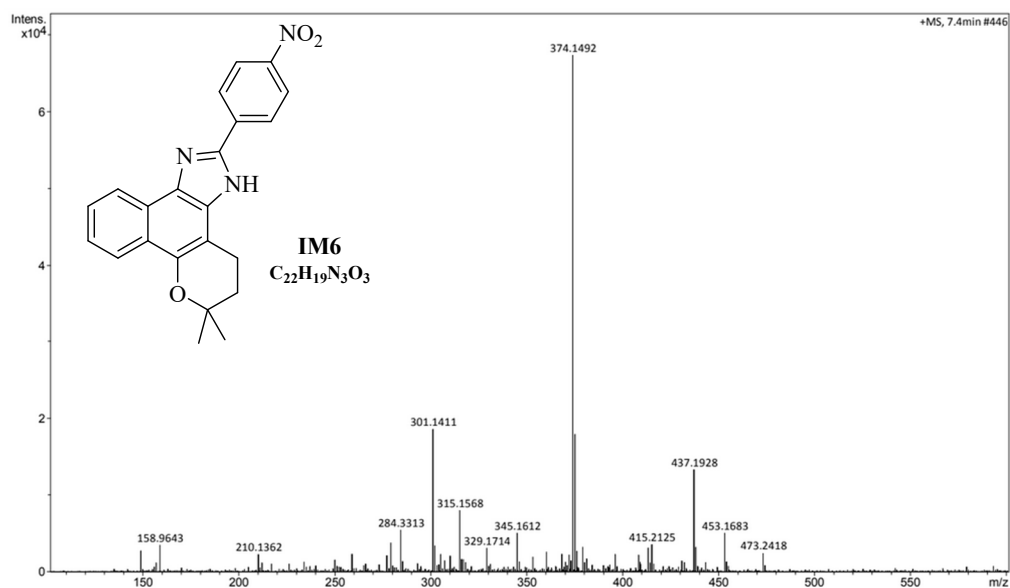

**Figure S6.** NMR spectra of 4,5-dihydro-6,6-dimethyl-6H-2-(4-nitrophenyl)-pyran[*b*-4,3]naphth[1,2-*d*]imidazole (**IM6**) in DMSO- $d_6$  and ESI-MS.

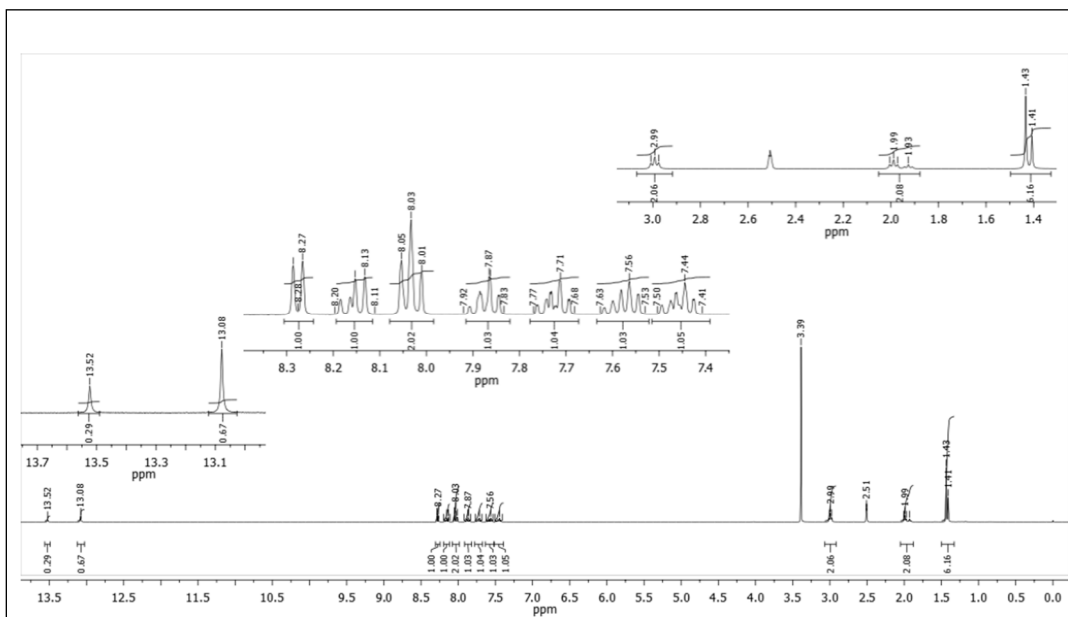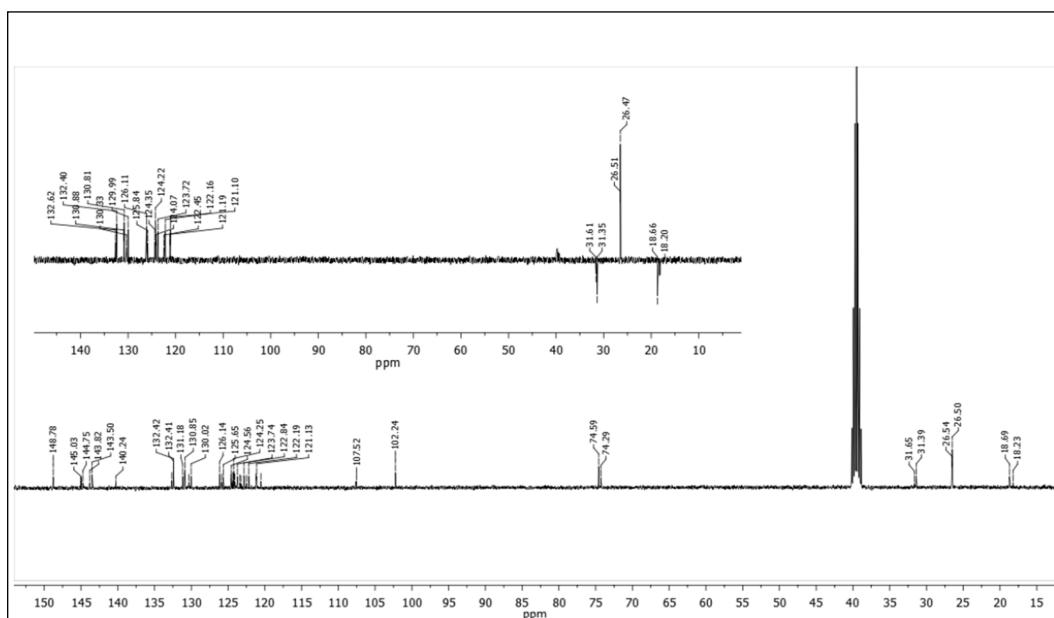

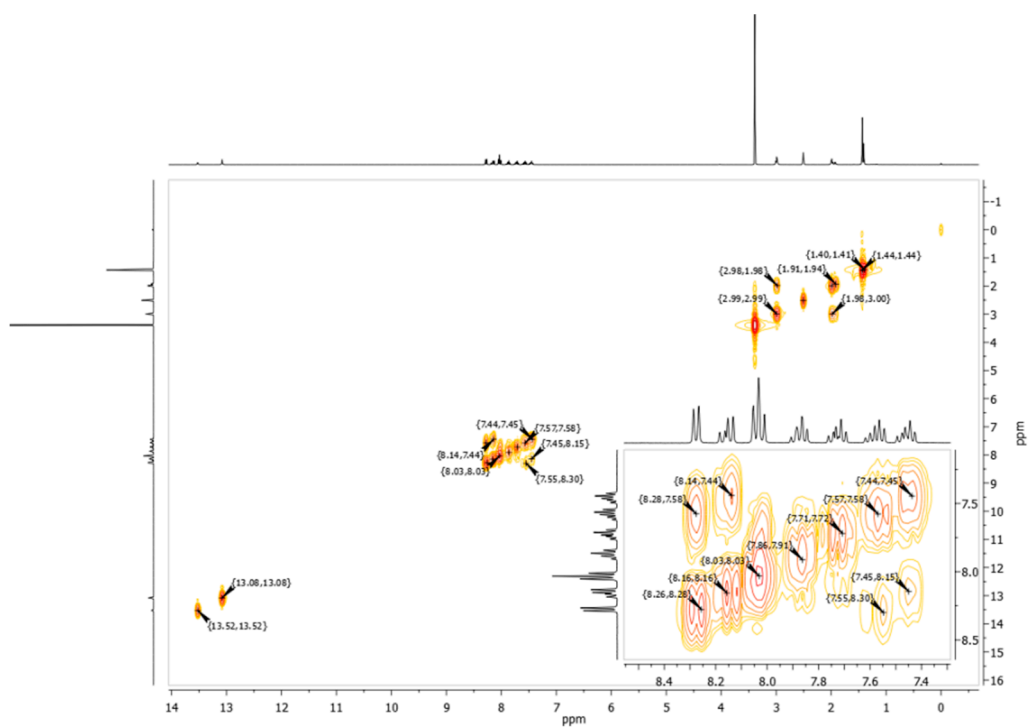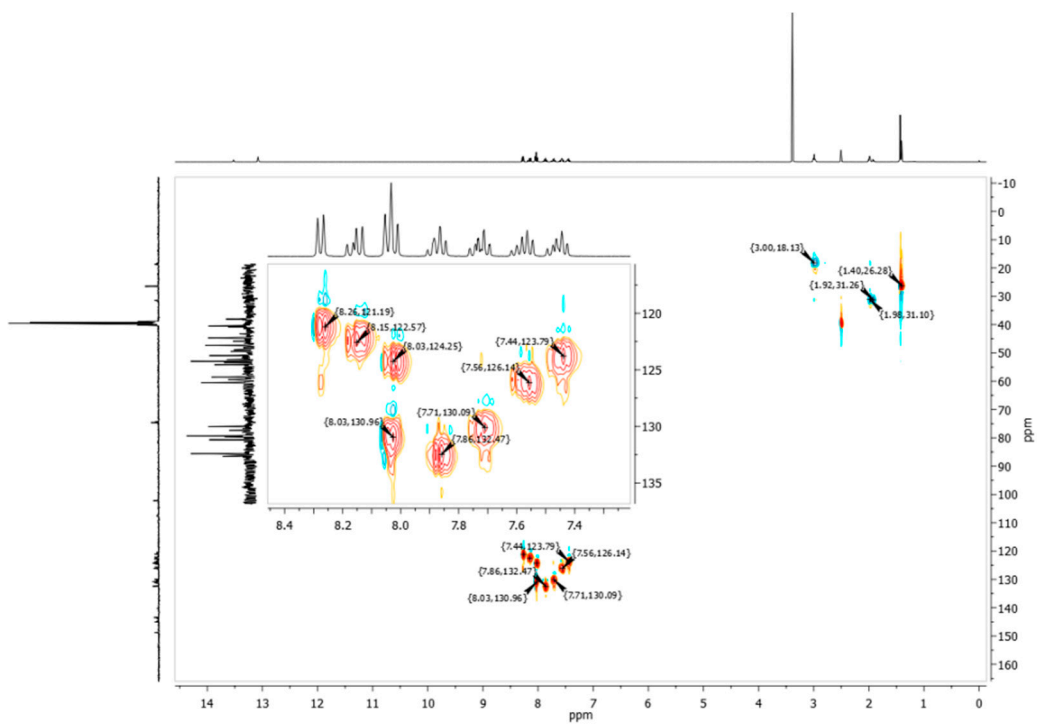

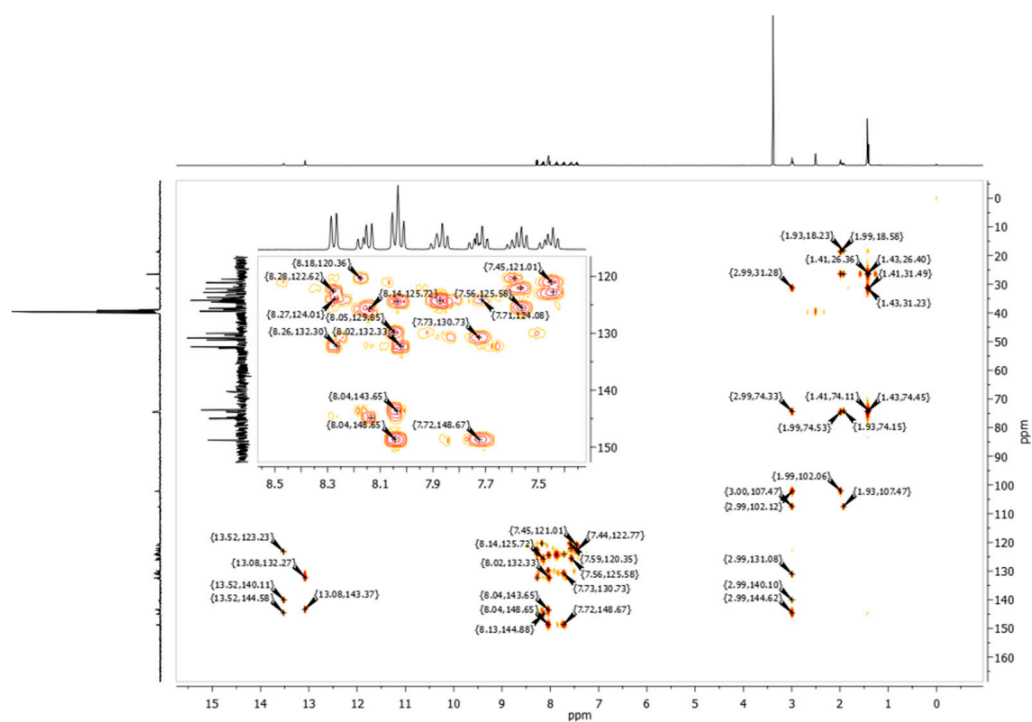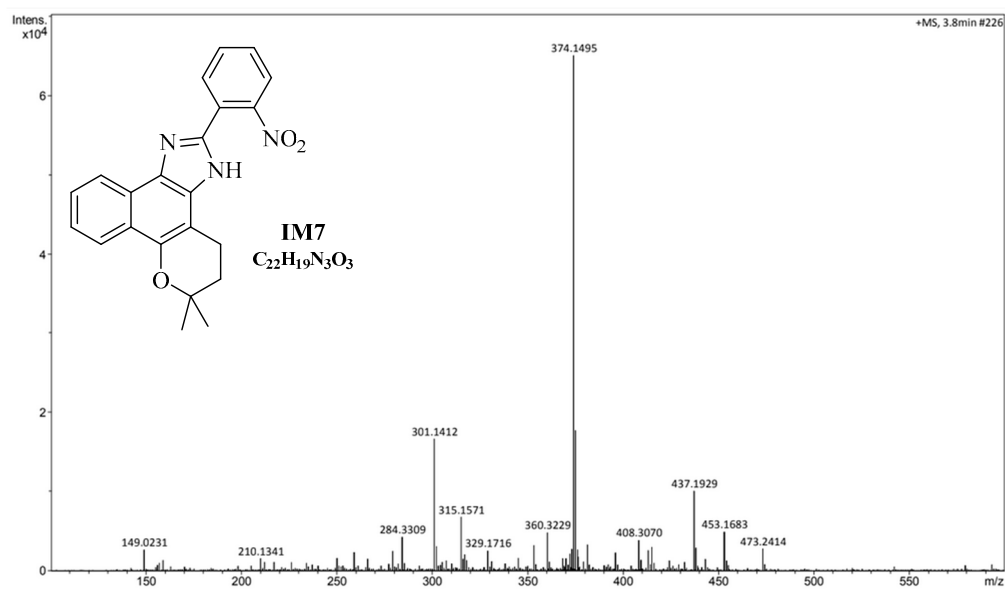

**Figure S7.** NMR spectra of 4,5-dihydro-6,6-dimethyl-6H-2-(2-nitrophenyl)-pyran[b-4,3]naphth[1,2-d]imidazole (**IM7**) in DMSO- $d_6$  and ESI-MS.

## 2. Solvatochromism study

**Table S1.** Wavelength (nm) and absorbance of the scanning spectra of the naphth[1,2-*d*]imidazoles obtained in the solvatochromism study.

| SOLVATOCHROMISM STUDY                      |              |                                 |             |                    |
|--------------------------------------------|--------------|---------------------------------|-------------|--------------------|
| $\lambda_{\text{Abs}}$ (nm) and absorbance |              |                                 |             |                    |
| COMPOUND                                   | HEXANE       | CH <sub>2</sub> Cl <sub>2</sub> | DMSO        | CH <sub>3</sub> OH |
| IM1                                        | 313 (0.088)  | 315 (0.107)                     | 320 (0.111) | 314 (0.068)        |
|                                            | 328 (0.068)  | 329 (0.117)                     | 333 (0.102) | 328 (0.077)        |
| IM2                                        | 291 (0.228)  | 289 (0.333)                     | 360 (0.125) | 288 (0.355)        |
|                                            | 344 (0.203)  | 348 (0.330)                     | 450 (0.149) | 343 (0.375)        |
| IM3                                        | 348 (0.152)  | 306 (0.209)                     | 305 (0.189) | 288 (0.243)        |
|                                            |              | 355 (0.334)                     | 360 (0.313) | 343 (0.320)        |
| IM4                                        | Not observed | 360 (0.125)                     | 346 (0.315) | 342 (0.342)        |
|                                            |              | 450 (0.149)                     | 362 (0.306) | 352 (0.293)        |
| IM5                                        | 302 (0.155)  | 321 (0.271)                     | 307 (0.494) | 300 (0.429)        |
|                                            | 352 (0.130)  | 374 (0.426)                     | 357 (0.614) | 353 (0.530)        |
|                                            |              | 485 (0.072)                     | 375 (0.573) |                    |
| IM6                                        | 290 (0.083)  | 321 (0.096)                     | 315 (0.098) | 298 (0.088)        |
|                                            | 413 (0.234)  | 428 (0.226)                     | 433 (0.235) | 414 (0.234)        |
| IM7                                        | 294 (0.235)  | 287 (0.220)                     | 281 (0.256) | 333 (0.184)        |
|                                            | 341 (0.241)  |                                 |             |                    |
|                                            | 427 (0.088)  | 336 (0.238)                     | 341 (0.229) |                    |

## 3. Absorbance and fluorescence emission spectrum

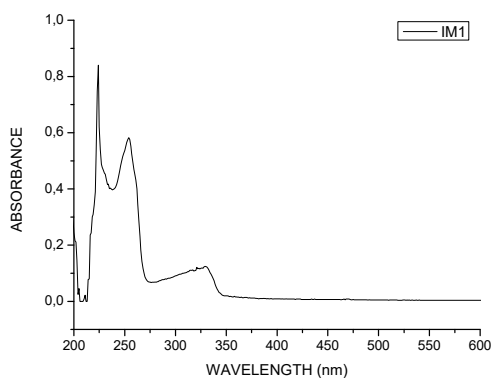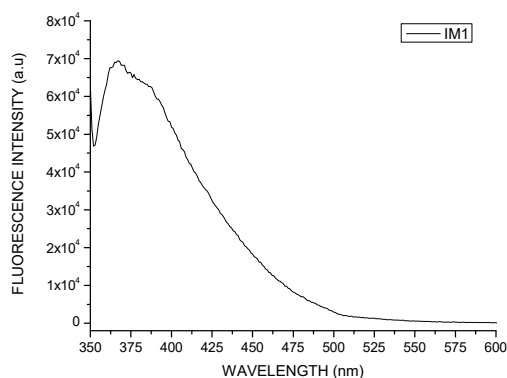

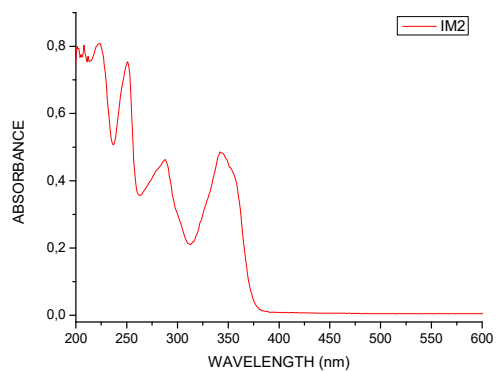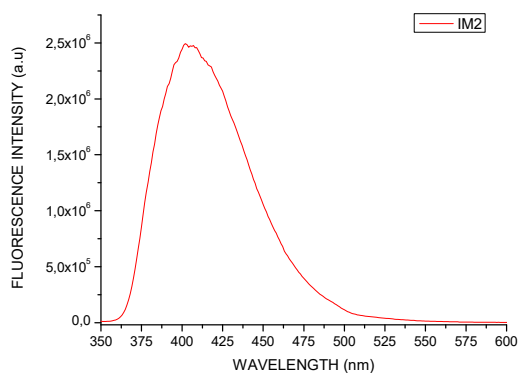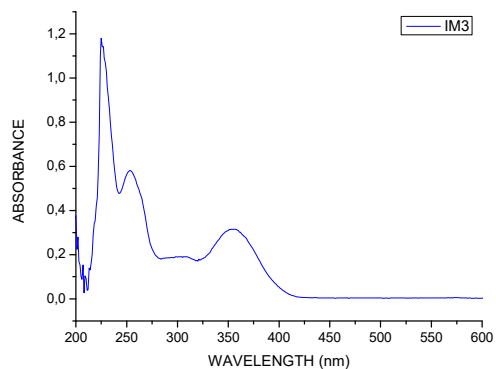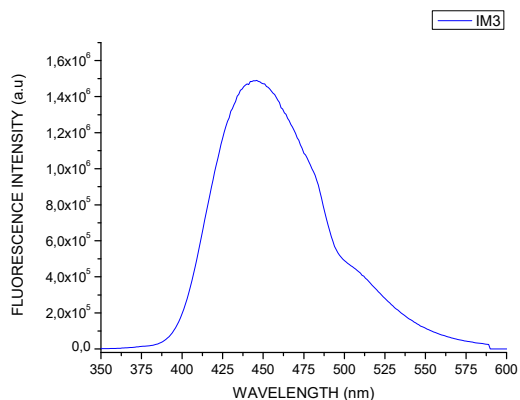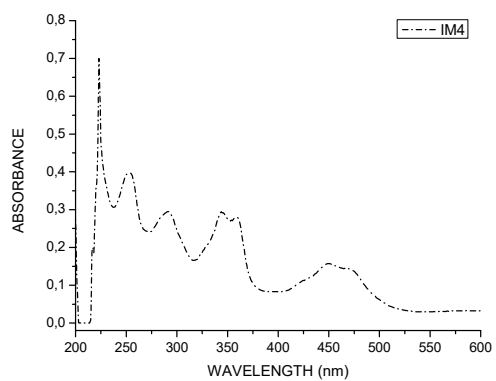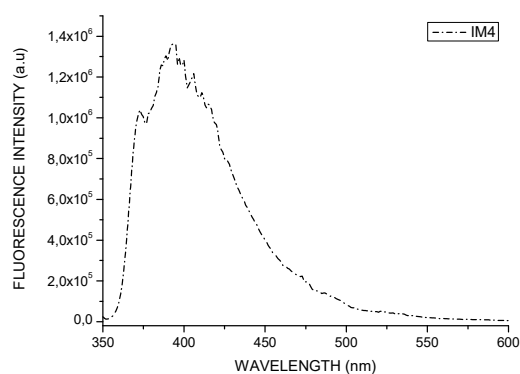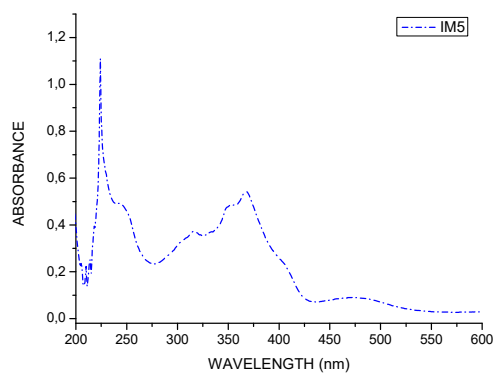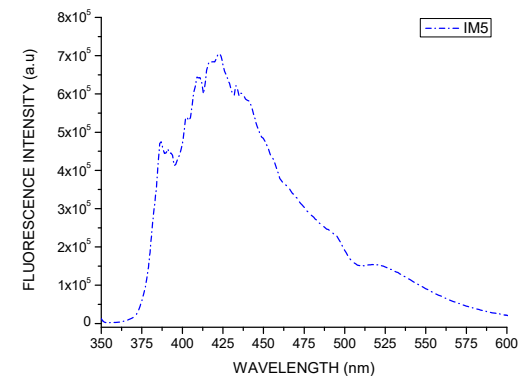

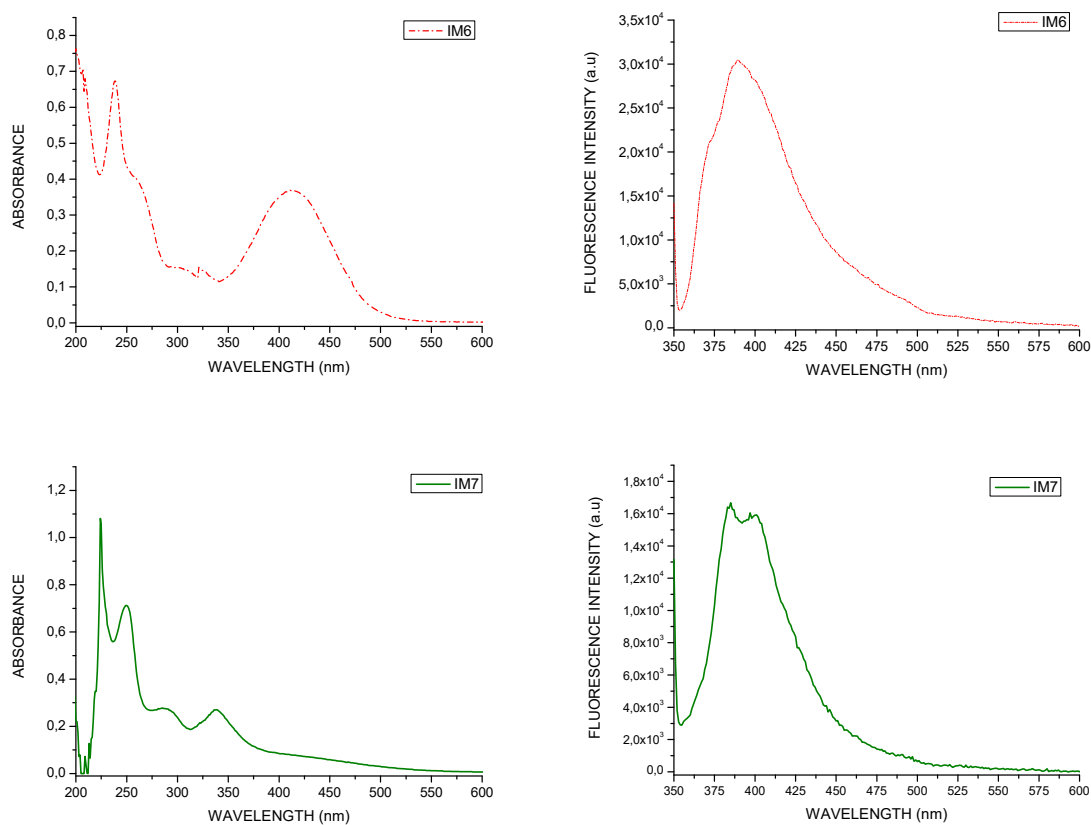

- a. Solvents used solvents: IM2 – DMSO; IM6 – CH<sub>3</sub>OH; IM1, IM3, IM4, IM5 – CH<sub>2</sub>Cl<sub>2</sub>; and IM7 hexane.  
 b. Excitation wavelength of 345 nm for all compounds.

**Figure S8.** Absorbance and emission spectra of naphth[1,2-*d*]imidazoles (**IM1–IM7**).
